# Supplementary material for: Real-World Use and Outcomes of Olaparib: a Population-Based Cohort Study
Source: Springer Nature journal article supplement (doi:10.1007/s11523-018-0604-z), 2018-11-16
Supplement: MOESM1 [file 16275984]

## Real-World Use and Outcomes of Olaparib: a Population-Based Cohort Study

Irene Eriksson, Björn Wettermark, Kjell Bergfeldt

<https://doi.org/10.1007/s11523-018-0604-z>

### Electronic supplementary material

#### Relation between genetic testing and personal/family history of cancer (N = 63)

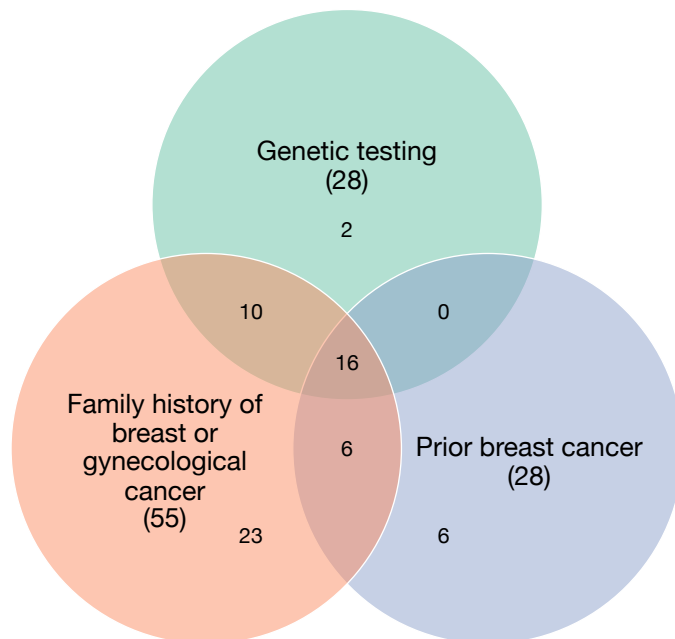

Among the 100 patients treated with olaparib for ovarian cancer, 63 patients had recorded personal (n = 28) and/or family (n = 55) history of breast or gynecological cancer and/or recorded genetic testing related procedure codes (n = 28).
